# Supplementary material for: Longitudinal Evolution of Diffusion Metrices in the Cerebello-Thalamo-Cortical Tract After MRgFUS Thalamotomy for Essential Tremor
Source: bioRxiv or medRxiv preprint supplement (doi:10.1101/2024.12.06.24318287), 2024-12-11
Supplement: Supplementary file [file media-1.pdf]

## Supplementary Figure 1

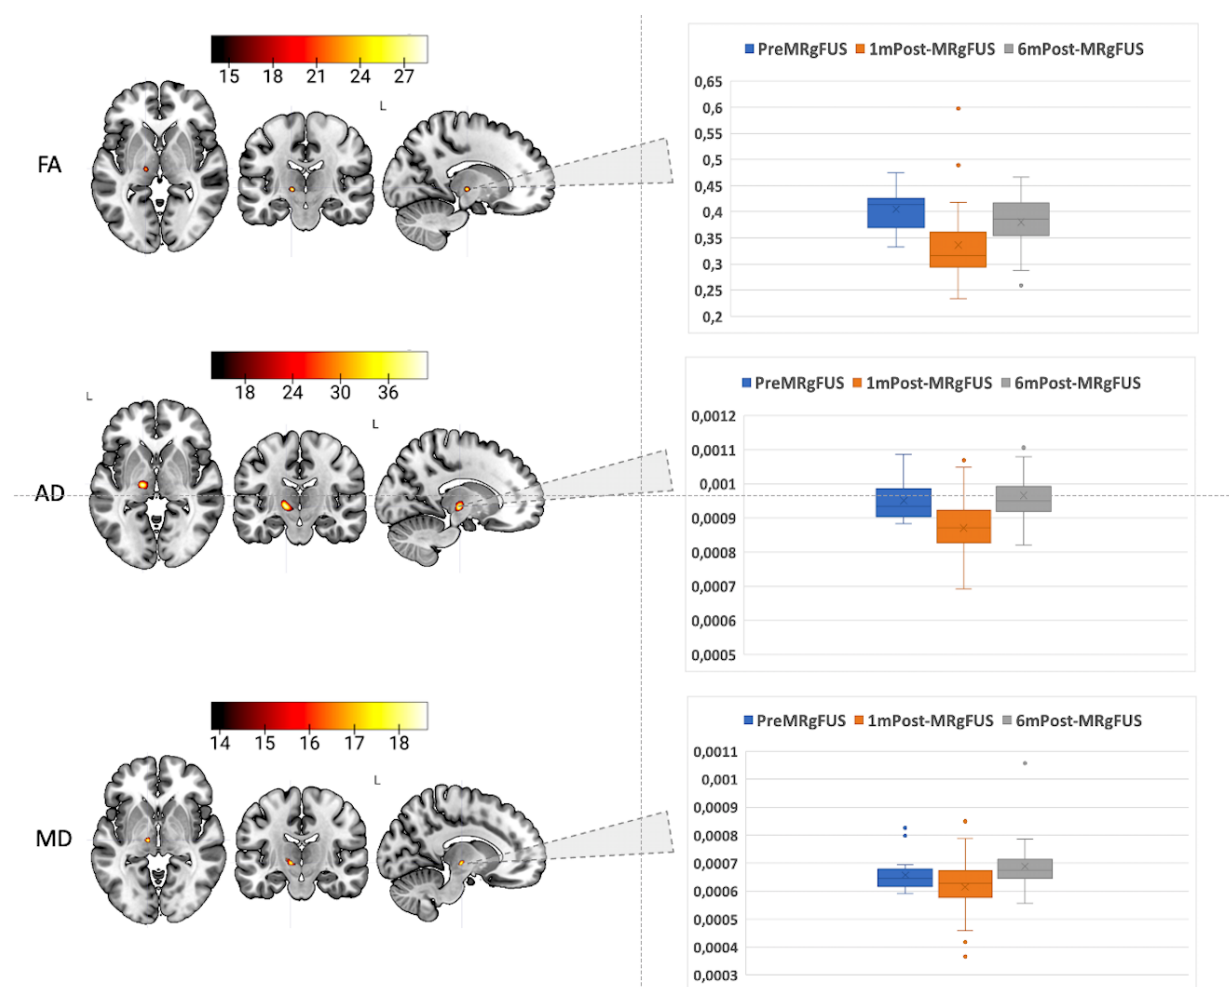

Above Figure represent the bar plots for FA, MD and AD created from the main time effect clusters over the time PreMRgFUS (T0), 1m Post-MRgFUS (T2), and 6mPost-MRgFUS (T3).
